# Supplementary material for: Facile synthesis of an electrically conductive polycarbazole–zirconium(iv)phosphate cation exchange nanocomposite and its room temperature ammonia sensing performance
Source: Royal Society of Chemistry journal article supplement (doi:10.1039/c5nj01029b), 2015-01-01
Supplement: c5nj01029b1.pdf [file c5nj01029b1.pdf]

**Electronic Supplementary Information**

**Facile synthesis of electrically conductive polycarbazole-zirconium(IV)phosphate cation exchange nanocomposite and its room temperature ammonia sensing performance**

**Umair Baig<sup>a\*</sup>, Waseem A. Wani<sup>b</sup>, Lee Ting Hun<sup>b</sup>**

*<sup>a</sup>Center of Excellence for Scientific Research Collaboration with MIT, King Fahd University of Petroleum and Minerals, Dhahran 31261, Saudi Arabia*

*<sup>b</sup>Institute of Bioproduct Development, Universiti Teknologi Malaysia 81310 UTM Skudai, Johor, Malaysia*

*\*Corresponding authors' email: [umairbaig@gmail.com](mailto:umairbaig@gmail.com) (Umair Baig)*

*Telephone: +966532975940; Fax: +9663-8604281*

**Table S1.** Parameters for DC electrical conductivity measurement and calculations by four-in-line probe instrument.

| <b>Parameters</b>       | <b>Ranges</b>   |
|-------------------------|-----------------|
| Current ranges          | 1 mA to 100 mA  |
| Voltage ranges          | 1mV to 100 mV   |
| Thickness of the pallet | 0.18 to 0.20 cm |
| Probe distance          | 0.22 cm         |
